# Supplementary material for: Improved viability and fertility of frozen-thawed dog sperm using adipose-derived mesenchymal stem cells
Source: PubMed Central journal article supplement (PMC7184611; doi:10.1038/s41598-020-61803-8), 2020-04-27
Supplement: 41598_2020_61803_MOESM1_ESM.pdf [file 41598_2020_61803_MOESM1_ESM.pdf]

*Supplementary Material*

**Improved viability and fertility of frozen-thawed dog sperm using adipose-derived mesenchymal stem cells**

Ahmad Yar Qamar<sup>1</sup>, Xun Fang<sup>1</sup>, Min Jung Kim<sup>2,\*</sup>, and Jongki Cho<sup>1,\*</sup>

\* Corresponding author: [cjki@cnu.ac.kr](mailto:cjki@cnu.ac.kr)

<sup>2,\*</sup> Co-corresponding author: [tinia19@snu.ac.kr](mailto:tinia19@snu.ac.kr)

## 1. Supplemental files

### Supplementary Figure Legends

**Supplementary Figure S1. Effect of canine adipose-derived mesenchymal stem cells (Ad-MSCs) on cryopreservation of dog semen.** Representative western blot images of fibronectin (FN1), annexin 1 (ANX1), high mobility group protein B (HMGB), dysferlin (DYSF) proteins, histone H3 (H3), and Beta-actin (BACT) protein expressed in post-thaw canine sperm. Where, Control; 1, Group 1;  $2.5 \times 10^6$  Ad-MSCs/mL, negative control; (-).

### Supplementary Figure S1

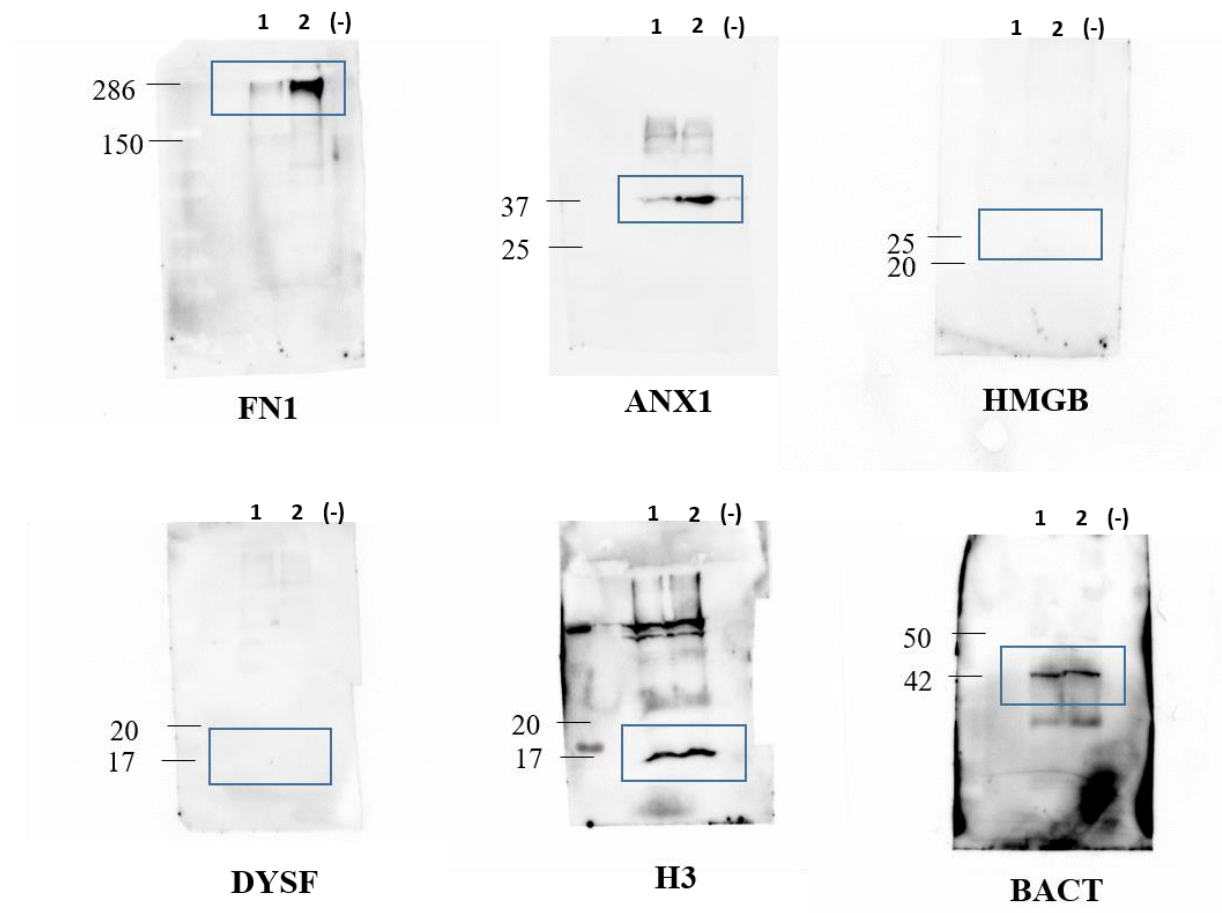

**Supplementary Figure S1. Effect of canine adipose-derived mesenchymal stem cells (Ad-MSCs) on cryopreservation of dog semen.** Representative western blot images of fibronectin (FN1), annexin 1 (ANX1), high mobility group protein B (HMGB), dysferlin (DYSF) proteins, histone H3 (H3), and Beta-actin (BACT) protein expressed in post-thaw canine sperm. Where, Control; 1, Group 1;  $2.5 \times 10^6$  Ad-MSCs/mL, negative control; (-).
